# Supplementary material for: Imidazolium ionic liquid-modified fibrous silica microspheres loaded with gold nanoparticles and their enhanced catalytic activity and reusability for the reduction of 4-nitrophenol
Source: Royal Society of Chemistry journal article supplement (doi:10.1039/c4ta01513d), 2014-05-06
Supplement: c4ta01513d1.pdf [file c4ta01513d1.pdf]

## Supplementary Information

### **Imidzaolium ionic liquid-modified fibrous silica microspheres loaded with gold nanoparticles and their enhanced catalytic activity and reusability for the reduction of 4-nitrophenol**

Honglei Yang,<sup>a</sup> Shuwen Li,<sup>a</sup> Xueyao Zhang,<sup>a</sup> Xiaoyu Wang<sup>\*b</sup> and Jiantai Ma<sup>\*a</sup>

<sup>a</sup> State Key Laboratory of Applied Organic Chemistry, College of Chemistry and Chemical Engineering, Lanzhou University, Lanzhou, Gansu 730000, P. R. China.

<sup>b</sup> School of Earth Sciences & Key Laboratory of Mineral Resources in Western China (Gansu Province), Lanzhou University, Lanzhou, Gansu 730000, P. R. China.

\*Corresponding author:

e-mail: majiantai@lzu.edu.cn (J. Ma); wangxiaoyu@lzu.edu.cn (X. Wang).

Tel.: +86-931-8912577;

Fax: +86-931-8912582.

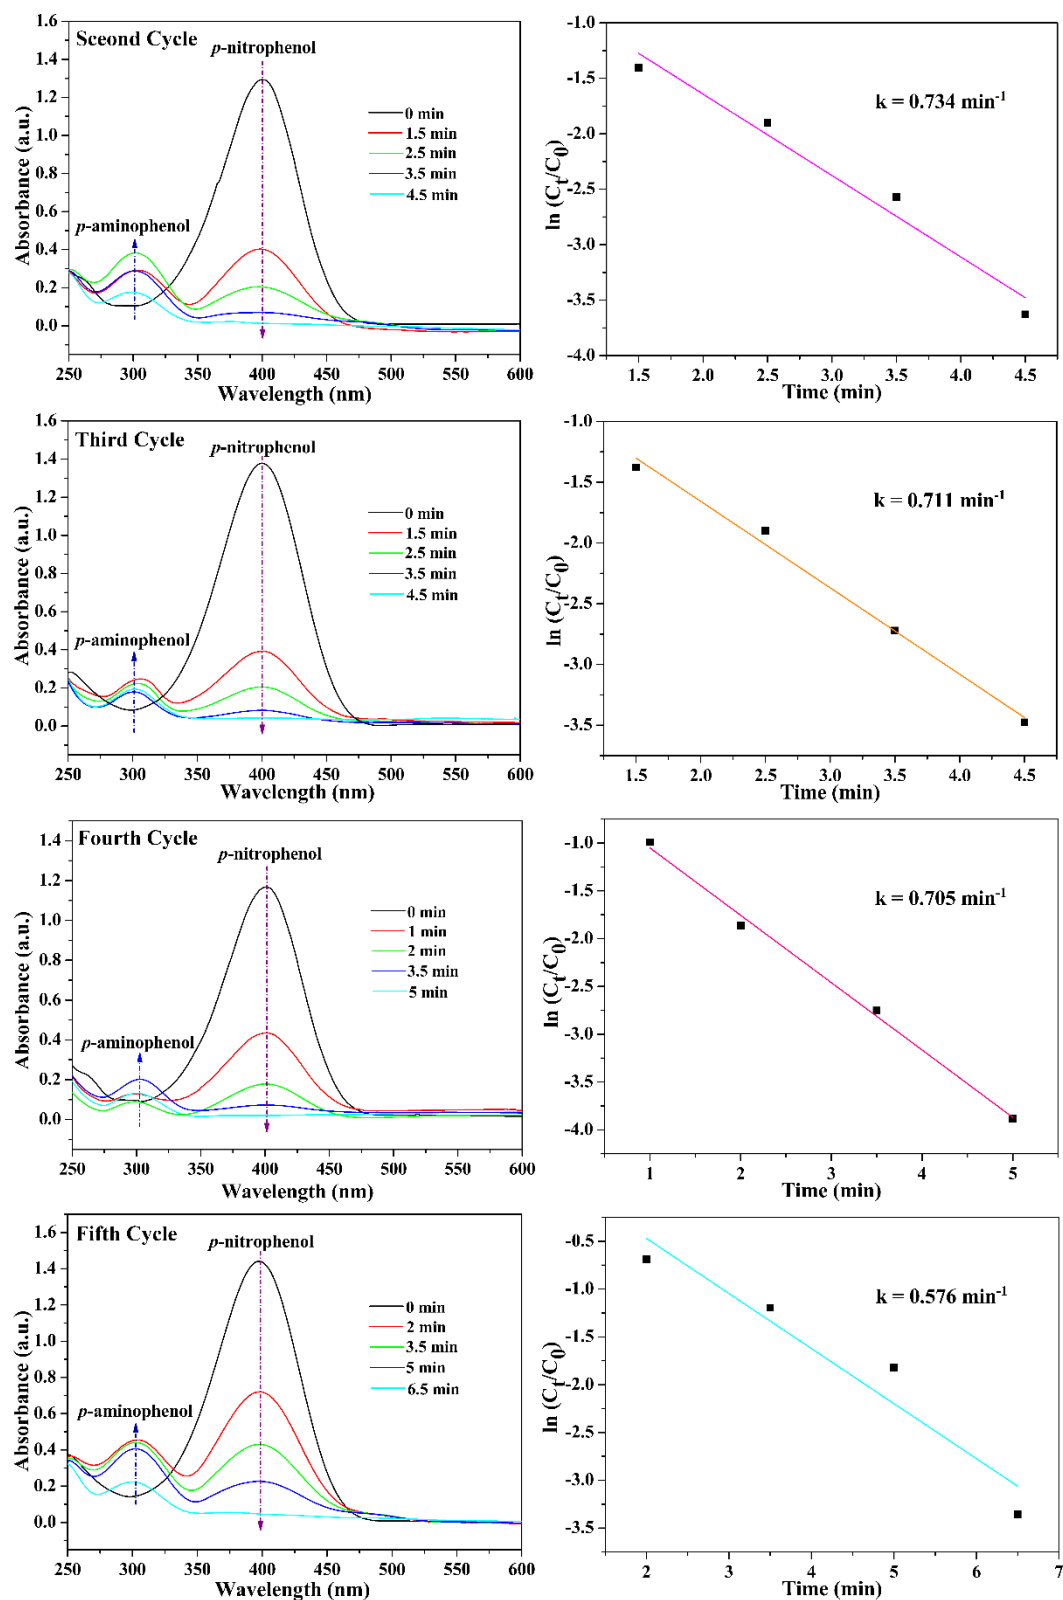

**Fig. S1** Successive UV-vis spectra and kinetic curves for the reduction of 4-NP by  $\text{NaBH}_4$  in the recycling experiments of the catalyst KCC-1-IL/Au ( $C_t$  and  $C_0$  are 4-NP concentrations at time  $t$  and 0, respectively).

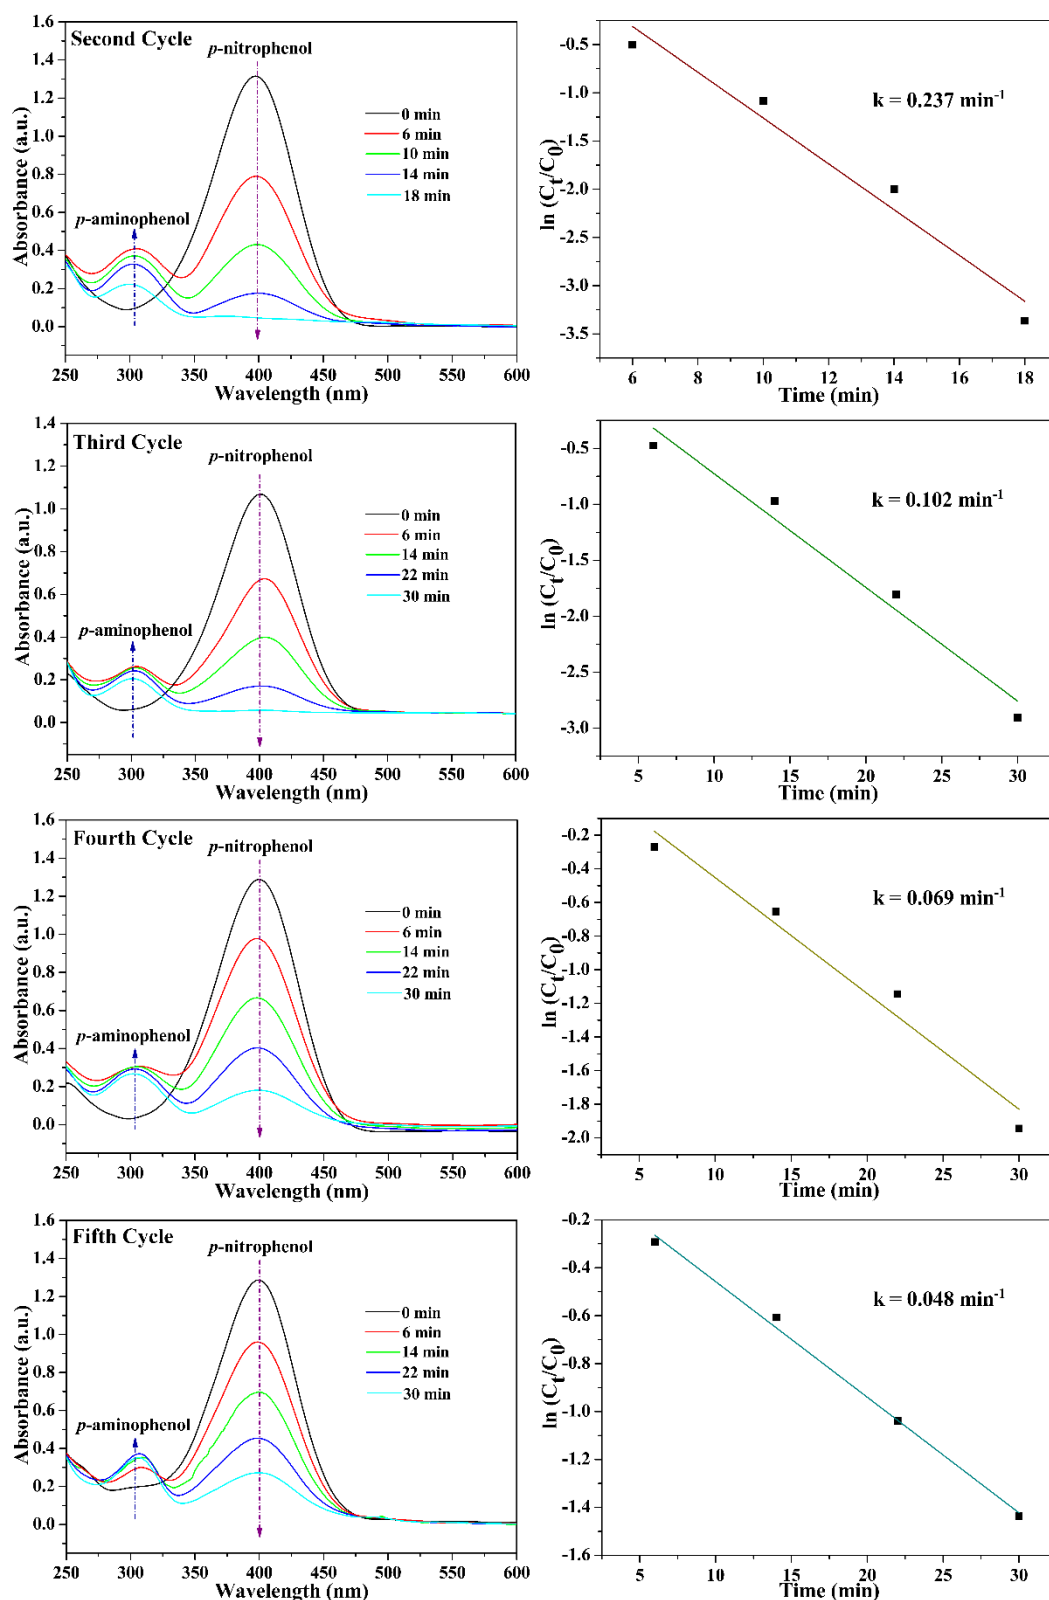

**Fig. S2** Successive UV-vis spectra and kinetic curves for the reduction of 4-NP by  $\text{NaBH}_4$  in the recycling experiments of the catalyst KCC-1/Au ( $C_t$  and  $C_0$  are 4-NP concentrations at time  $t$  and 0, respectively).

**Table S1** The kinetic rate constant  $k$  for the reduction of 4-NP by  $\text{NaBH}_4$  in the recycling experiments of the catalysts KCC-1-IL/Au and KCC-1/Au

| catalyst    | cycle | $k$ ( $\text{min}^{-1}$ ) |
|-------------|-------|---------------------------|
| KCC-1-IL/Au | 1     | 0.718                     |
|             | 2     | 0.734                     |
|             | 3     | 0.711                     |
|             | 4     | 0.705                     |
|             | 5     | 0.576                     |
| KCC-1/Au    | 1     | 0.365                     |
|             | 2     | 0.237                     |
|             | 3     | 0.102                     |
|             | 4     | 0.069                     |
|             | 5     | 0.048                     |
